# Supplementary material
Source: PubMed Central journal article supplement (PMC1451220)
Supplement: JCI0628553sd.pdf [file JCI0628553sd.pdf]

## SUPPLEMENT REFERENCES

- S1. Fleischer, A.B. 2000. *The Clinical Management of Itching*. New York, USA: Parthenon. 210 pp.
- S2. Bickford, R.G. 1938. Experiments relating to the itch sensation, its peripheral mechanism and central pathway. *Clin Sci.* 3:377-386. S.
- S3. Rothman, S. 1941. Physiology of itching. *Physiol Rev.* 21:357-381. S.
- S4. Darsow, U., Mautner, V.F., Bromm, B., Scharein, E., and Ring, J. 1997. [The Eppendorf Pruritus Questionnaire]. *Hautarzt.* 48:730-733. S.
- S5. von Frey, M. 1922. [On the physiology of pruritus]. *Arch Neerland Physiol.* 142-145. S.
- S6. Yosipovitch, G., Goon, A.T., Wee, J., Chan, Y.H., Zucker, I., and Goh, C.L. 2002. Itch characteristics in Chinese patients with atopic dermatitis using a new questionnaire for the assessment of pruritus. *Int J Dermatol.* 41:212-216. S.
- S7. McGlone, F., Rukwied, R., Howard, M., and Hitchcock, D. 2004. Histamine-induced discriminative and affective responses revealed by functional MRI. In *Itch - Basic mechanisms and therapy*. G. Yosipovitch, M.W. Greaves, A.B. Fleischer, and F. McGlone, editors. New York, USA: Marcel Dekker Inc. 51-62.
- S8. Ward, L., Wright, E., and McMahon, S.B. 1996. A comparison of the effects of noxious and innocuous counterstimuli on experimentally induced itch and pain. *Pain.* 64:129-138. S.
- S9. Heyer, G., Dotzer, M., Diepgen, T.L., and Handwerker, H.O. 1997. Opiate and H1 antagonist effects on histamine induced pruritus and allodynia. *Pain.* 73:239-243. S.
- S10. Baluk, P. 1997. Neurogenic inflammation in skin and airways. *J Investig Dermatol Symp Proc.* 2:76-81. S.
- S11. Hollenberg, M.D., and Compton, S.J. 2002. International Union of Pharmacology. XXVIII. Proteinase-activated receptors. *Pharmacol Rev.* 54:203-217. S.
- S12. Simone, D.A., Alreja, M., and LaMotte, R.H. 1991. Psychophysical studies of the itch sensation and itchy skin ("allodynia") produced by intracutaneous injection of histamine. *Somatosens Mot Res.* 8:271-279. S.
- S13. Heyer, G., Ulmer, F.J., Schmitz, J., and Handwerker, H.O. 1995. Histamine-induced itch and allodynia (itchy skin) in atopic eczema patients and controls. *Acta Derm Venereol.* 75:348-352. S.
- S14. Thieme, K., Gromnica-Ihle, E., and Flor, H. 2003. Operant behavioral treatment of

- fibromyalgia: a controlled study. *Arthritis Rheum.* 49:314-320. S.
- S15. Roberston, I.M., Jordan, J.M., and Whitlock, F.A. 1975. Emotions and skin (II)-the conditioning of scratch responses in cases of lichen simplex. *Br J Dermatol.* 92:407-412. S.
- S16. Szallasi, A., and Blumberg, P.M. 1999. Vanilloid (Capsaicin) receptors and mechanisms. *Pharmacol Rev.* 51:159-212. S.
- S17. Hergenhahn, M., Kusumoto, S., and Hecker, E. 1984. On the active principles of the spurge family (Euphorbiaceae). V. Extremely skin-irritant and moderately tumor-promoting diterpene esters from *Euphorbia resinifera* Berg. *J Cancer Res Clin Oncol.* 108:98-109. S.
- S18. Wei, E.T., and Seid, D.A. 1983. AG-3-5: a chemical producing sensations of cold. *J Pharm Pharmacol.* 35:110-112. S.
- S19. Grando, S.A. 1997. Biological functions of keratinocyte cholinergic receptors. *J Invest Dermatol Symp Proc.* 2:41-48. S.
- S20. Dillon, S.R., Sprecher, C., Hammond, A., Bilsborough, J., Rosenfeld-Franklin, M., Presnell, S.R., Haugen, H.S., Maurer, M., Harder, B., Johnston, J., et al. 2004. Interleukin 31, a cytokine produced by activated T cells, induces dermatitis in mice. *Nat Immunol.* 5:752-760. S.
- S21. Katugampola, R., Church, M.K., and Clough, G.F. 2000. The neurogenic vasodilator response to endothelin-1: a study in human skin in vivo. *Exp Physiol.* 85:839-846. S.
- S22. Maurer, M., Wedemeyer, J., Metz, M., Piliponsky, A.M., Weller, K., Chatterjea, D., Clouthier, D.E., Yanagisawa, M.M., Tsai, M., and Galli, S.J. 2004. Mast cells promote homeostasis by limiting endothelin-1-induced toxicity. *Nature.* 432:512-516. S.
- S23. Hagermark, O., Strandberg, K., and Gronneberg, R. 1979. Effects of histamine receptor antagonists on histamine-induced responses in human skin. *Acta Derm Venereol.* 59:297-300. S.
- S24. Sugimoto, Y., Iba, Y., Nakamura, Y., Kayasuga, R., and Kamei, C. 2004. Pruritus-associated response mediated by cutaneous histamine H3 receptors. *Clin Exp Allergy.* 34:456-459. S.
- S25. Lundequist, A., Tchougounova, E., Abrink, M., and Pejler, G. 2004. Cooperation between mast cell carboxypeptidase A and the chymase mouse mast cell protease 4 in the formation and degradation of angiotensin II. *J Biol Chem.* 279:32339-32344. S.
- S26. Ny, A., and Egelrud, T. 2004. Epidermal hyperproliferation and decreased skin barrier function in mice overexpressing stratum corneum chymotryptic enzyme. *Acta Derm*

- Venereol.* 84:18-22. S.
- S27. Hayashi, I., and Majima, M. 1999. Reduction of sodium deoxycholic acid-induced scratching behaviour by bradykinin B2 receptor antagonists. *Br J Pharmacol.* 126:197-204. S.
- S28. Andoh, T., Katsube, N., Maruyama, M., and Kuraishi, Y. 2001. Involvement of leukotriene B(4) in substance P-induced itch-associated response in mice. *J Invest Dermatol.* 117:1621-1626. S.
- S29. Andoh, T., Yageta, Y., Takeshima, H., and Kuraishi, Y. 2004. Intradermal nociceptin elicits itch-associated responses through leukotriene B(4) in mice. *J Invest Dermatol.* 123:196-201. S.
- S30. Janiszewski, J., Bienenstock, J., and Blennerhassett, M.G. 1994. Picomolar doses of substance P trigger electrical responses in mast cells without degranulation. *Am J Physiol.* 267:C138-145. S.
- S31. Okabe, T., Hide, M., Koro, O., and Yamamoto, S. 2000. Substance P induces tumor necrosis factor-alpha release from human skin via mitogen-activated protein kinase. *Eur J Pharmacol.* 398:309-315. S.
- S32. Burbach, G.J., Kim, K.H., Zivony, A.S., Kim, A., Aranda, J., Wright, S., Naik, S.M., Caughman, S.W., Ansel, J.C., and Armstrong, C.A. 2001. The neurosensory tachykinins substance P and neurokinin A directly induce keratinocyte nerve growth factor. *J Invest Dermatol.* 117:1075-1082. S.
- S33. Scholzen, T.E., and Luger, T.A. 2004. Neutral endopeptidase and angiotensin-converting enzyme -- key enzymes terminating the action of neuroendocrine mediators. *Exp Dermatol.* 13 Suppl 4:22-26. S.
- S34. Kanda, N., and Watanabe, S. 2003. Histamine enhances the production of nerve growth factor in human keratinocytes. *J Invest Dermatol.* 121:570-577. S.
- S35. Kimata, H. 2003. Kissing reduces allergic skin wheal responses and plasma neurotrophin levels. *Physiol Behav.* 80:395-398. S.
- S36. Raap, U., Goltz, C., Deneka, N., Bruder, M., Renz, H., Kapp, A., and Wedi, B. 2005. Brain-derived neurotrophic factor is increased in atopic dermatitis and modulates eosinophil functions compared with that seen in nonatopic subjects. *J Allergy Clin Immunol.* 115:1268-1275. S.
- S37. Onigbogi, O., Ajayi, A.A., and Ukponmwan, O.E. 2000. Mechanisms of chloroquine-induced body-scratching behavior in rats: evidence of involvement of endogenous opioid peptides. *Pharmacol Biochem Behav.* 65:333-337. S.

- S38. Odum, L., Petersen, L.J., Skov, P.S., and Ebskov, L.B. 1998. Pituitary adenylate cyclase activating polypeptide (PACAP) is localized in human dermal neurons and causes histamine release from skin mast cells. *Inflamm Res.* 47:488-492. S.
- S39. Delgado, M., Abad, C., Martinez, C., Leceta, J., and Gomariz, R.P. 2001. Vasoactive intestinal peptide prevents experimental arthritis by downregulating both autoimmune and inflammatory components of the disease. *Nat Med.* 7:563-568. S.
- S40. Hashimoto, Y., Arai, I., Tanaka, M., and Nakaike, S. 2005. Prostaglandin D2 inhibits IgE-mediated scratching by suppressing histamine release from mast cells. *J Pharmacol Sci.* 98:90-93. S.
- S41. Gunal, A.I., Ozalp, G., Yoldas, T.K., Gunal, S.Y., Kirciman, E., and Celiker, H. 2004. Gabapentin therapy for pruritus in haemodialysis patients: a randomized, placebo-controlled, double-blind trial. *Nephrol Dial Transplant.* 19:3137-3139. S.
- S42. Hefti, F.F., Rosenthal, A., Walicke, P.A., Wyatt, S., Vergara, G., Shelton, D.L., and Davies, A.M. 2005. Novel class of pain drugs based on antagonism of NGF. *Trends Pharmacol Sci.* S.
